# Supplementary material
Source: PubMed Central journal article supplement (PMC3736679)
Supplement: mmc1.pdf [file mmc1.pdf]

# **Oscillatory Flow Accelerates Autocrine Signaling due to Nonlinear Effect of Convection on Receptor-Related Actions**

Marek Nebyla, Michal Příbyl,\* and Igor Schreiber

Department of Chemical Engineering, Institute of Chemical Technology, Prague, Czech Republic

*Autocrine Signaling under Oscillatory Flow*

Nebyla et al.

Submitted March 20, 2013, and accepted for publication June 14, 2013.

\*Correspondence: [pribylm@vscht.cz](mailto:pribylm@vscht.cz)

## Supplementary Material

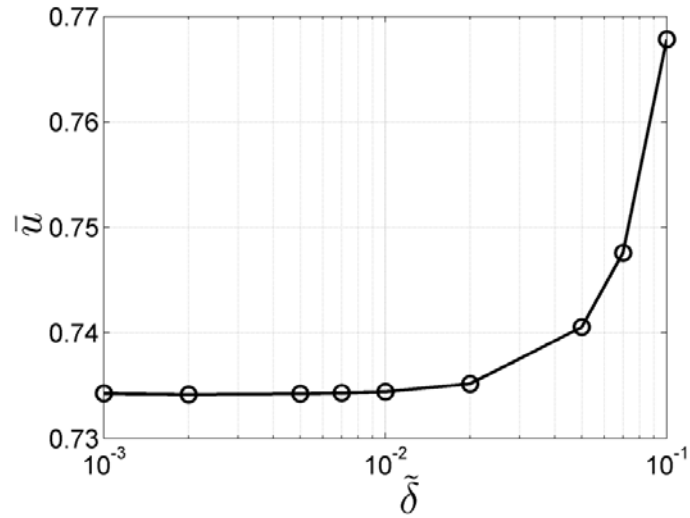

Figure S1: Dependence of the propagation velocity on the tuning parameter for the sharpness of the sigmoidal function. Parameter Set 1,  $Pe_A = 4$ ,  $\tilde{T} = 3$ .
